# Supplementary material for: Feedback, Crosstalk and Competition: Ingredients for Emergent Non-Linear Behaviour in the PI3K/mTOR Signalling Network
Source: MDPI journal article supplement (doi:10.3390/ijms22136944), 2021-06-28
Supplement: s1 [file s1]

**Table S1.** Ongoing cancer clinical trials of drugs targeting the PI3K/mTOR signalling network (source: [ClinicalTrials.gov](https://ClinicalTrials.gov)).

| Tested regimens                                                                                                                                                                             | Pathology characteristics                             | Setting                                                                                           | Phase    | Primary outcome measures                                                 | No. of patients | Trial identifier                                                                |
|---------------------------------------------------------------------------------------------------------------------------------------------------------------------------------------------|-------------------------------------------------------|---------------------------------------------------------------------------------------------------|----------|--------------------------------------------------------------------------|-----------------|---------------------------------------------------------------------------------|
| <b>Gedatolisib / PF-05212384 (dual PI3K/mTOR inhibitor)</b>                                                                                                                                 |                                                       |                                                                                                   |          |                                                                          |                 |                                                                                 |
| Gedatolisib + Palbociclib (CDK4/6i)                                                                                                                                                         | N/A                                                   | Advanced squamous cell lung cancer<br>Advanced pancreatic cancer<br>Advanced head and neck cancer | I        | Maximum tolerated dose<br>Incidence of treatment-emergent adverse events | 96              | <a href="https://clinicaltrials.gov/ct2/show/study/NCT03065062">NCT03065062</a> |
| Gedatolisib + Talazoparib (PARP1/2i)                                                                                                                                                        | Triple-negative<br>HER2 negative and BRCA1/2 mutation | Advanced or metastatic breast cancer                                                              | I and II | Maximum tolerated dose<br>Objective response rate                        | 54              | <a href="https://clinicaltrials.gov/ct2/show/study/NCT03911973">NCT03911973</a> |
| Gedatolisib + Faslodex (ERi) + Palbociclib (CDK4/6i)                                                                                                                                        | ER positive, HER2 negative                            | Stage I-IV non-inflammatory invasive breast cancer                                                | Ib       | Treatment-related adverse events                                         | 18              | <a href="https://clinicaltrials.gov/ct2/show/study/NCT02626507">NCT02626507</a> |
| <b>Vistusertib / AZD2014 (mTOR inhibitor)</b>                                                                                                                                               |                                                       |                                                                                                   |          |                                                                          |                 |                                                                                 |
| Vistusertib                                                                                                                                                                                 | N/A                                                   | Grade II-III intracranial meningioma                                                              | II       | Progression-free survival                                                | 28              | <a href="https://clinicaltrials.gov/ct2/show/study/NCT03071874">NCT03071874</a> |
| 1. Fulvestrant (ERi)<br>2. Vistusertib (continuous schedule) + Fulvestrant (ERi)<br>3. Vistusertib (intermittent schedule) + Fulvestrant (ERi)<br>4. Everolimus (mTORi) + Fulvestrant (ERi) | ER positive, HER2 negative                            | Advanced or metastatic breast cancer                                                              | II       | Progression-free survival                                                | 333             | <a href="https://clinicaltrials.gov/ct2/show/study/NCT02216786">NCT02216786</a> |
| 1. Vistusertib (continuous schedule) + Olaparib (PARPi)<br>2. Vistusertib (intermittent schedule) + Olaparib (PARPi)<br>3. Capivasertib (AKTi) + Olaparib (PARPi)                           | BRCA1/2 mutation carrier<br>Triple-negative           | Endometrial, breast cancer, ovarian, primary peritoneal, or fallopian tube cancer                 | I and II | Maximum tolerated dose                                                   | 159             | <a href="https://clinicaltrials.gov/ct2/show/study/NCT02208375">NCT02208375</a> |

| Everolimus (mTOR inhibitor)                                                                                                                  |                                                                                                                      |                                                                     |          |                                                                                                 |      |                             |
|----------------------------------------------------------------------------------------------------------------------------------------------|----------------------------------------------------------------------------------------------------------------------|---------------------------------------------------------------------|----------|-------------------------------------------------------------------------------------------------|------|-----------------------------|
| (1. Everolimus<br>2. Placebo                                                                                                                 | N/A                                                                                                                  | Invasive unilateral or bilateral breast cancer                      | III      | Benefit from adding everolimus to standard endocrine treatments                                 | 1279 | <a href="#">NCT01805271</a> |
| Everolimus + Sorafenib (multikinase inhibitor)                                                                                               | N/A                                                                                                                  | Thyroid carcinoma                                                   | II       | Response rate                                                                                   | 41   | <a href="#">NCT01141309</a> |
| 1. Everolimus followed by STZ-5FU (thymidylate synthetase inhibitor)<br>2. STZ-5FU (thymidylate synthetase inhibitor) followed by Everolimus | N/A                                                                                                                  | Metastatic or advanced pancreatic neuroendocrine tumours            | III      | First progression-free survival                                                                 | 141  | <a href="#">NCT02246127</a> |
| Alpelisib / BYL719 (PI3K inhibitor)                                                                                                          |                                                                                                                      |                                                                     |          |                                                                                                 |      |                             |
| 1. LSZ102 (ER degrader)<br>2. LSZ102 (ER degrader) + LEE011 (CDK4/6i)<br>3. LSZ102 (ER degrader) + BYL719                                    | ER positive, HER2 negative                                                                                           | Locally recurrent or metastatic breast cancer                       | I        | Incidence of dose limiting toxicities<br><br>Safety and tolerability                            | 199  | <a href="#">NCT02734615</a> |
| Alpelisib + Letrozole (aromatase inhibitor)                                                                                                  | ER positive and/or PR positive and HER2 negative<br><br>A minimum of 10 patients will need to have a PIK3CA mutation | Stage IV invasive mammary carcinoma                                 | I        | Maximum tolerated dose                                                                          | 46   | <a href="#">NCT01791478</a> |
| Alpelisib (250, 300, 350 mg) + Nab-paclitaxel (mitosis inhibitor)                                                                            | HER2 negative                                                                                                        | Locally recurrent or metastatic breast cancer                       | I and II | Recommended phase II dose of BYL719 + Nab-paclitaxel<br><br>Overall response rate               | 44   | <a href="#">NCT02379247</a> |
| Copanlisib / BAY 80-6946 (PI3K inhibitor)                                                                                                    |                                                                                                                      |                                                                     |          |                                                                                                 |      |                             |
| Copanlisib                                                                                                                                   | N/A                                                                                                                  | Recurrent/refractory solid tumors or lymphoma in pediatric patients | I and II | Maximum tolerated dose<br><br>Dose-limiting toxicities<br><br>Treatment-emergent adverse events | 142  | <a href="#">NCT03458728</a> |

|                                                                                                                                                                                                                                                                                                                                                                                                               |                                                             |                                                                                                  |            |                                                                                                                                                                                  |     |                             |
|---------------------------------------------------------------------------------------------------------------------------------------------------------------------------------------------------------------------------------------------------------------------------------------------------------------------------------------------------------------------------------------------------------------|-------------------------------------------------------------|--------------------------------------------------------------------------------------------------|------------|----------------------------------------------------------------------------------------------------------------------------------------------------------------------------------|-----|-----------------------------|
|                                                                                                                                                                                                                                                                                                                                                                                                               |                                                             |                                                                                                  |            | Objective response rate<br>Disease control rate<br>Progression-free survival                                                                                                     |     |                             |
| Copanlisib + Nivolumab (PD-1i)                                                                                                                                                                                                                                                                                                                                                                                | N/A                                                         | Relapsed/refractory solid tumors with expansions in mismatch-repair proficient colorectal cancer | I and II   | Maximum tolerated dose<br>Objective response rate                                                                                                                                | 54  | <a href="#">NCT03711058</a> |
| 1. Copanlisib + Trastuzumab (HER2i) + Pertuzumab (HER2i)<br>2. Trastuzumab (HER2i) + Pertuzumab (HER2i)                                                                                                                                                                                                                                                                                                       | HER2 positive<br>PIK3CA or PTEN mutation                    | Locally advanced or metastatic breast cancer                                                     | I and II   | Incidence of adverse events and serious adverse events<br>Dose limiting toxicities<br>Progression-free survival                                                                  | 102 | <a href="#">NCT04108858</a> |
| <b>Inavolisib / GDC-0077 / RG6114 (PI3K inhibitor)</b>                                                                                                                                                                                                                                                                                                                                                        |                                                             |                                                                                                  |            |                                                                                                                                                                                  |     |                             |
| 1. Inavolisib + Palbociclib (CDK4/6i) + Fulvestrant (ERi)<br>2. Placebo + Palbociclib (CDK4/6i) + Fulvestrant (ERi)                                                                                                                                                                                                                                                                                           | Hormone receptor positive, HER2 negative<br>PIK3CA mutation | Metastatic or locally advanced breast cancer                                                     | II and III | Progression-free survival                                                                                                                                                        | 400 | <a href="#">NCT04191499</a> |
| 1. Inavolisib<br>2. Inavolisib + Palbociclib (CDK4/6i) + Letrozole (aromatase inhibitor)<br>3. Inavolisib + Letrozole (aromatase inhibitor)<br>4. Inavolisib + Fulvestrant (ERi)<br>5. Inavolisib + Palbociclib (CDK4/6i) + Fulvestrant (ERi)<br>6. Inavolisib + Palbociclib (CDK4/6i) + Fulvestrant (ERi) + Metformin (energetic stress inducer)<br>7. Inavolisib + Trastuzumab (HER2i) + Pertuzumab (HER2i) | PIK3CA mutation                                             | Locally advanced or metastatic solid tumors                                                      | I          | Percentage of participants with dose limiting toxicities<br>Recommended phase II dose of Inavolisib<br>Percentage of participants with adverse events and serious adverse events | 256 | <a href="#">NCT03006172</a> |

| Ipatasertib / GDC-0068 (Akt inhibitor)                                                                                                               |                                          |                                                            |     |                                                                                                                                                                |      |                             |
|------------------------------------------------------------------------------------------------------------------------------------------------------|------------------------------------------|------------------------------------------------------------|-----|----------------------------------------------------------------------------------------------------------------------------------------------------------------|------|-----------------------------|
| Ipatasertib                                                                                                                                          | N/A                                      | Locally advanced or metastatic solid tumors                | I   | Maximum/minimum plasma concentration<br>Time to maximum plasma concentration<br>Terminal half-life<br>Apparent clearance<br>Accumulation ratio at steady state | 20   | <a href="#">NCT04341259</a> |
| 1. Ipatasertib + Fulvestrant (ERi)<br>2. Ipatasertib + Letrozole (aromatase inhibitor)<br>3. Ipatasertib + Fulvestrant (ERi) + Palbociclib (CDK4/6i) | Hormone receptor positive, HER2 negative | Metastatic or locally advanced breast cancer               | I   | Incidence of treatment-emergent adverse events                                                                                                                 | 60   | <a href="#">NCT03959891</a> |
| 1. Ipatasertib + Abiraterone (CYP17i)<br>2. Placebo + Abiraterone (CYP17i)                                                                           | PTEN loss                                | Metastatic castrate-resistant prostate cancer              | III | Radiographic progression-free survival                                                                                                                         | 1101 | <a href="#">NCT03072238</a> |
| Capivasertib / AZD5363 (Akt inhibitor)                                                                                                               |                                          |                                                            |     |                                                                                                                                                                |      |                             |
| Capivasertib                                                                                                                                         | AKT mutation                             | Advanced refractory cancers/lymphomas/multiple myeloma     | II  | Objective response rate                                                                                                                                        | 35   | <a href="#">NCT04439123</a> |
| 1. Capivasertib + Paclitaxel (ERi)<br>2. Placebo + Paclitaxel (ERi)                                                                                  | Triple-negative                          | Advanced or metastatic breast cancer                       | II  | Progression-free survival                                                                                                                                      | 140  | <a href="#">NCT02423603</a> |
| 1. Capivasertib + Paclitaxel (ERi)<br>2. Placebo + Paclitaxel (ERi)                                                                                  | Triple-negative                          | Locally advanced or metastatic breast cancer               | III | Progression-free and overall survival                                                                                                                          | 942  | <a href="#">NCT03997123</a> |
| MK2206 (Akt inhibitor)                                                                                                                               |                                          |                                                            |     |                                                                                                                                                                |      |                             |
| MK2206 + Hydroxychloroquine (lysosome inhibitor)                                                                                                     | N/A                                      | Advanced solid tumors, melanoma, prostate or kidney cancer | I   | Maximum tolerated dose of MK2206<br>Dose-limiting toxicity rate                                                                                                | 62   | <a href="#">NCT01480154</a> |

|                                                                                                                                  |                                                                                                                                  |                                                                                      |    |                                                                                                                                                                     |     |                             |
|----------------------------------------------------------------------------------------------------------------------------------|----------------------------------------------------------------------------------------------------------------------------------|--------------------------------------------------------------------------------------|----|---------------------------------------------------------------------------------------------------------------------------------------------------------------------|-----|-----------------------------|
| 1. Bicalutamide<br>2. MK2206 + Bicalutamide                                                                                      | N/A                                                                                                                              | Recurrent prostate carcinoma                                                         | II | The proportion of patients with undetectable prostate-specific antigen level                                                                                        | 108 | <a href="#">NCT01251861</a> |
| 1. Erlotinib (EGFRi)<br>2. AZD6244 (MEK1/2i)<br>3. MK2206<br>4. Lapatinib (HER1/2i)<br>5. Sunitinib (PDGF-R and VEGFR inhibitor) | EGFR mutation<br>KRAS, BRAF, HRAS, or NRAS mutation<br>PIK3CA, AKT, or PTEN mutation<br>KIT or PDGFRA mutation<br>ERBB2 mutation | Advanced non-small cell lung cancer<br>Small cell lung cancer<br>Thymic malignancies | II | Determine the feasibility of the use of tumor molecular profiling and<br><br>Estimate the response rate of molecular-profile directed treatments targeted therapies | 469 | <a href="#">NCT01306045</a> |
